# Supplementary material for: Directional Reflective Surface Formed via Gradient-Impeding Acoustic Meta-Surfaces
Source: PubMed Central journal article supplement (PMC4999803; doi:10.1038/srep32300), 2016-08-26
Supplement: srep32300-s1.pdf [file srep32300-s1.pdf]

# **Supplementary Information for Directional Reflective Surface Formed via Gradient- Impeding Acoustic Meta-surfaces**

**Kyungjun Song<sup>1\*</sup>, Jedo Kim<sup>2</sup>, Hur Shin<sup>1</sup>, Jun-Hyuk Kwak<sup>1</sup>, Seong-Hyun Lee<sup>3</sup>, Taesung Kim<sup>4</sup>**

<sup>1</sup>Department of Nanoconvergence Systems, Korea Institute of Machinery and Materials, 156 Gajeongbuk-Ro, Daejeon, 305-343, Republic of Korea

<sup>2</sup>Department of Mechanical System Design Engineering, Hongik Univ. 94 Wausan-ro, Mapo-gu, Seoul 121-791, Seoul, Republic of Korea

<sup>3</sup>Department of System Dynamics, Korea Institute of Machinery and Materials, 156 Gajeongbuk-Ro, Daejeon, 305-343, Republic of Korea

<sup>4</sup>Department of Mechanical Engineering, Ulsan National Institute of Science and Technology (UNIST), 50 UNIST-gil, Ulsan 44919, Republic of Korea.

**Correspondence : Kyungjun Song (email: [songk@kimm.re.kr](mailto:songk@kimm.re.kr))**

# Supplementary Information

## Supplementary Note

### Note 1: Radiation patterning of artificially textured surface with periodic array of identical Helmholtz resonators backed by rigid hard wall

Let us consider sound beamforming obtained using acoustic metamaterials consisting of a linear array of identical Helmholtz resonators with  $p = 36$  mm placed at distance  $d = 20$  mm above the rigid walls, as illustrated in Fig. S4(a). The sound pressure  $P$  is simply obtained using the method of images illustrated in Fig. S4(b). If the point source is located at a distance  $h$  from the rigid wall with acoustic meta-materials, the pressure field of the point source can be described by

$$P_i = A \left( \frac{1}{r_-} e^{-jk r_-} \right) \quad (S1)$$

where  $r_-$  is the distance from the point  $(0, h)$ . The reflected sound pressure  $P_r$  has the same magnitude and reflection phase  $\Phi$ , because the Helmholtz resonator yields the  $\Phi$  induced by the impedance of a series LC resonator. Based on the image method, a second source of the same strength and with a different reflection phase  $\Phi$  is placed at  $(0, -h)$ , thus yielding the reflected sound pressure

$$P_r = A \left( \frac{1}{r_+} e^{-jk r_+ - j\Phi} \right) \quad (S2)$$

where  $r_+$  is the distance from the point  $(0, -h)$ . Thus, the  $p$  in the region  $z > 0$  is given by the sum of the incident pressure  $p_i$  and  $p_r$

$$P = P_i + P_r = A \left( \frac{1}{r_-} e^{-jk r_-} + \frac{1}{r_+} e^{-jk r_+ - j\Phi} \right) \quad (S3)$$

where  $\Phi$  is the reflectance phase of the rigid walls with the acoustic meta-surfaces. In the approximation  $r \gg h$ , Eq. (S3) becomes

$$P = \frac{A}{r} e^{-jk r} \left( \frac{e^{jk \Delta r}}{1 - \frac{\Delta r}{r}} + \frac{e^{-jk \Delta r - j\Phi}}{1 + \frac{\Delta r}{r}} \right) \quad (S4)$$

where  $\Delta r \sim h \cos \theta$ . Because  $\frac{\Delta r}{r} \ll 1$ , Eq. (S4) becomes

$$\mathbf{P} = \frac{A}{r} e^{-jk r} \left( e^{jkh \cos \theta} + e^{-jkh \cos \theta - j\Phi} \right) \quad (\text{S5})$$

For example, the rigid boundary at  $\Phi = 0$  generates a reflected wave with the same magnitude and phase as the incident field. On the other hand, the pressure release boundary condition of  $\Phi = \pi$  yields a reflected wave with the same magnitude but the opposite phase to the incident field. Fig. S4(c) illustrates the reflection phase of a single unit cell with  $p = 36$  mm, calculated using the finite element method (FEM). The artificial textured surface at 1200 Hz provides the pressure release boundary condition at  $\Phi = \pi$ . The numerical and experimental results for the radiation patterning obtained for a microphone located at  $h = 70$  mm are illustrated in Fig. S4(d) and (e), respectively. Thus, the sound intensity at 1200 Hz provides dipole radiation resulting from the textured meta-surfaces.

**Note 2 : Radiation bandwidth for array of identical Helmholtz resonators backed by rigid hard wall**

Let us attempt to calculate the radiation bandwidth (BW) for an array of identical Helmholtz resonators backed by a rigid hard wall. In the case of the array of Helmholtz resonators, the electrical analogue can be described by series impedance  $Z = \eta + j\omega L + 1/j\omega C$  where the sound pressure is regarded as a voltage source. The amount power dissipation in the radiation is measure of the radiation efficiency. Thus, the radiation efficiency is at a maximum at  $\Phi = \pi$  (at resonance frequency), which means that the textured surface acts as a low-impedance boundary. The radiation efficiency of the textured surface changes according to the variation of the surface impedance  $Z_m$ . Here, the radiation bandwidth (BW) indicates the distance between the two frequencies when the radiation falls to half its maximum value. These conditions occur when the magnitude of the textured surface  $Z_m$  is equal to the characteristic impedance of air  $\eta$

$$|Z_m| = \eta. \quad (S6)$$

Substituting  $Z_m = j\omega L + 1/j\omega C$  into Eq. (S6), we obtain

$$|j\omega L + 1/j\omega C| = \eta. \quad (S7)$$

Through numerical derivations, a detailed expression for  $\omega$  can be obtained, where

$$\omega^2 = \frac{1}{LC} + \frac{\eta^2}{2L^2} \pm \frac{\eta}{L} \sqrt{\frac{1}{LC} + \frac{\eta^2}{4L}}. \quad (S8)$$

Discarding the  $\left(\frac{\eta}{L}\right)^2$  term in Eq. (S8), because  $\frac{1}{LC} \gg \left(\frac{\eta}{L}\right)^2$ , we find

$$\omega \sim \omega_o \sqrt{1 + \eta \sqrt{\frac{C}{L}}} \sim \omega_o \left[ 1 \pm \frac{\eta}{2} \sqrt{\frac{C}{L}} \right], \quad (S9)$$

where  $\omega_o$  is the resonant frequency. Thus, the radiation bandwidth (BW) of the array of identical Helmholtz resonators, which consists of a series of LC resonators, can be expressed as

$$BW \sim \frac{\Delta\omega}{\omega_o} \sim \eta \sqrt{\frac{C}{L}}. \quad (S10)$$

From Eq. (S10), the radiation bandwidth is controlled by the geometry of the Helmholtz resonators and the environmental materials, such as air or water.

## Supplementary Figures

### Figure S1

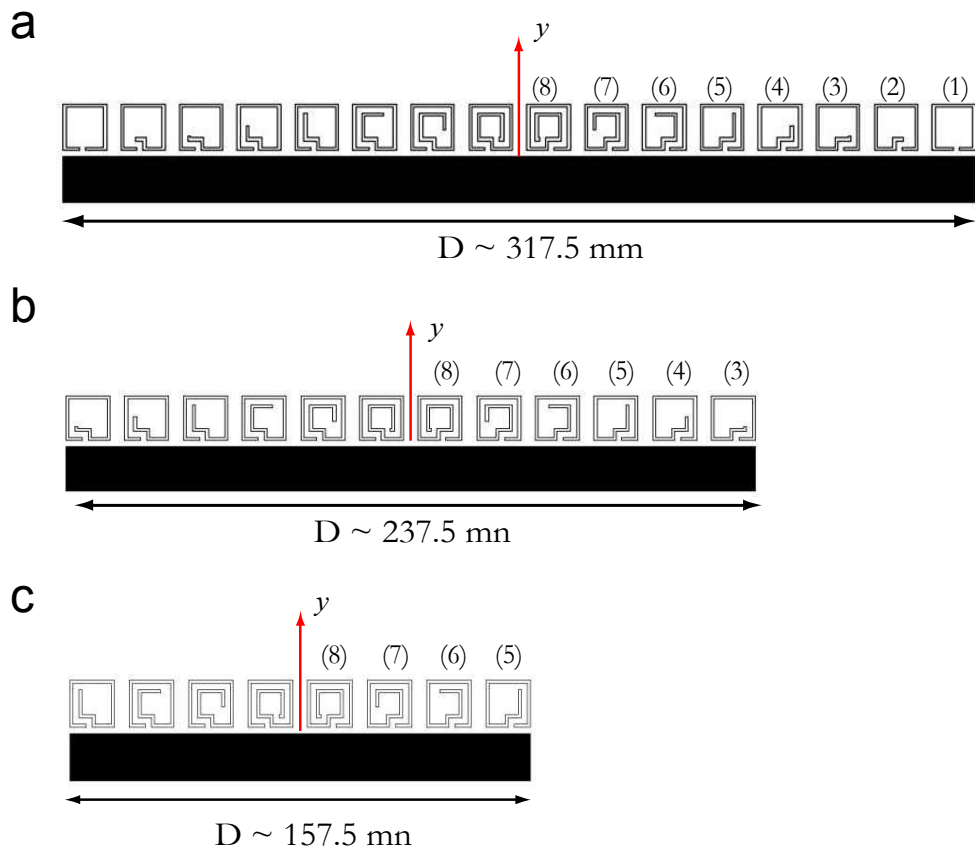

**Supplementary Fig. S1 | Basic schematics of Samples 1, 2 and 3.** Basic schematic of meta-surfaces consisting of a periodic array of Helmholtz resonators with different coiling paths: (a) Sample 1, the number of resonator on each side,  $N$ , is 8, (b) Sample 2,  $N=6$ , and (c) Sample 3,  $N=4$ .

**Figure S2**

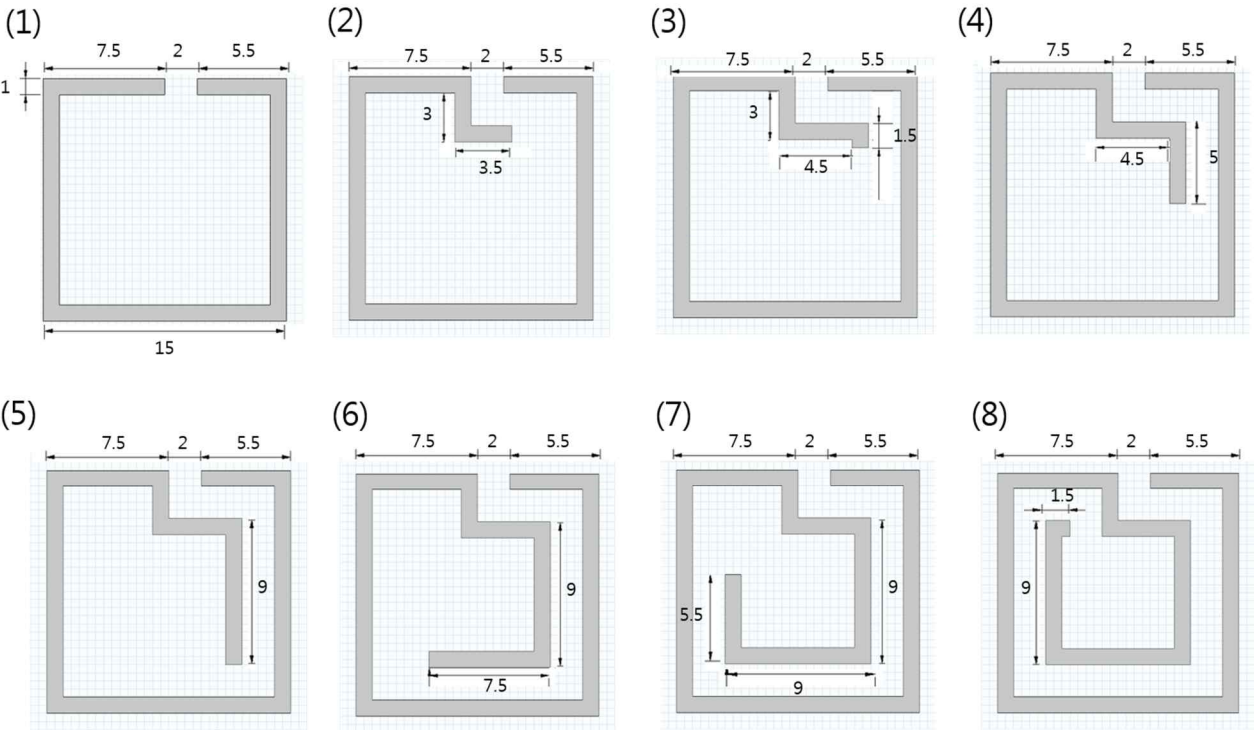

**Supplementary Fig. S2 | Basic geometries of 8 different Helmholtz resonator elements.**

**Figure S3**

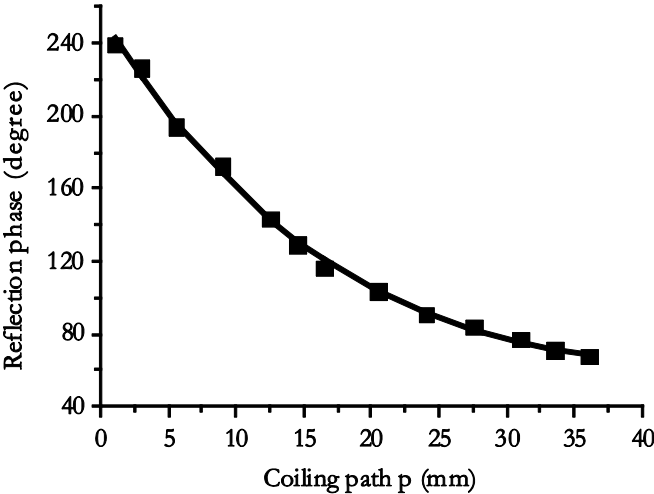

**Supplementary Fig. S3** | Plot of reflection phase  $\Phi$  versus coiling path at 1490Hz. Points show the result of FEM calculations, and line is given by Eqn.(3).

**Figure S4**

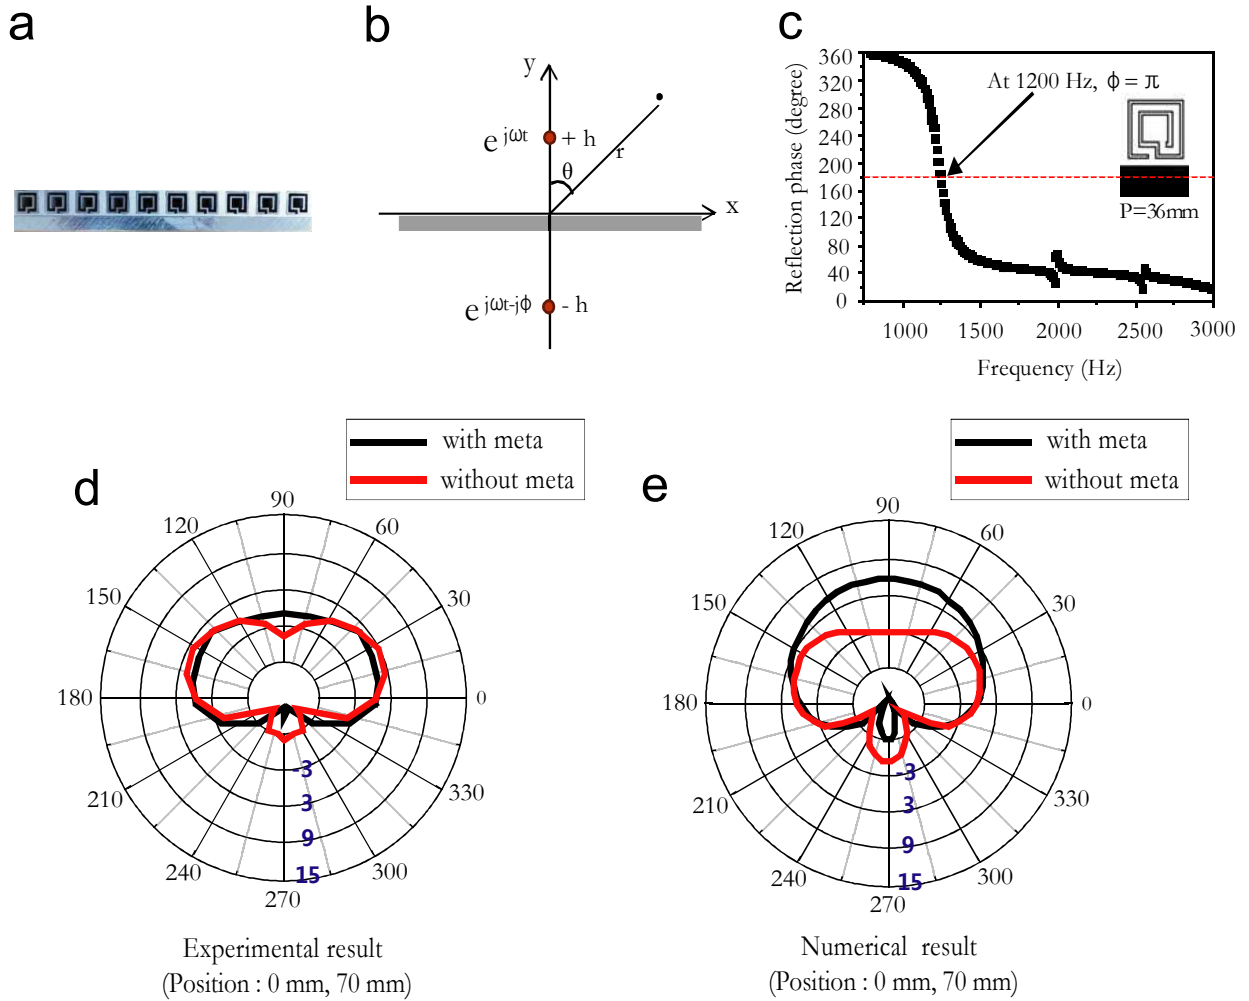

**Supplementary Fig. S4 | Radiation patterning for periodic array of identical Helmholtz resonator arrays backed by rigid surface.** (a) The sample has periodic distance  $d = 20$  mm and path length  $p = 36$  mm. The total number of Helmholtz resonators is 10. (b) Image method for calculating the acoustic field of an acoustic source near an artificial textured surface above a rigid wall. The source and source image are located at  $(0, h)$  and  $(0, -h)$ , respectively. The field point is located at  $(r \sin \theta, r \cos \theta)$ . (c) Reflection phase of periodic array of identical Helmholtz resonators calculated via finite element method (FEM). (d) Experimental results for polar sound intensity at  $(0, 70)$  for 1200Hz frequency. (e) Numerical results for polar sound intensity at  $(0, 70)$ , for 1200Hz frequency.



**Figure S5**

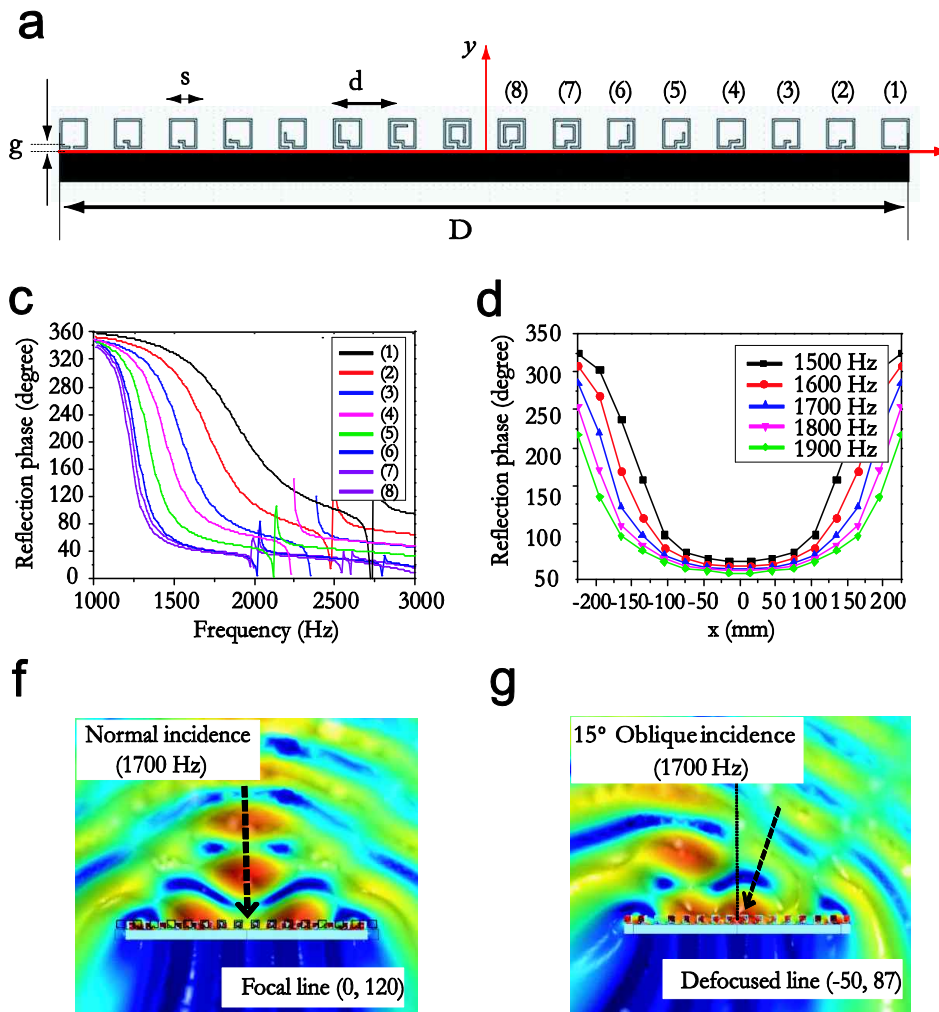

**Supplementary Fig. S5** | (a) Schematic of acoustic meta-surface consisting of array of Helmholtz resonators with varying coiled path lengths,  $p$  (Sample 1, number of resonators on each side,  $N = 8$ ). The subwavelength width,  $s$ , subwavelength separation,  $d$ , gap,  $g$ , and total length,  $D$ , are fixed to 15, 30, 2, and 300 mm, respectively, while  $p$  is adjusted to 1, 5.5, 9, 12.5, 16.5, 24, 31, and 36 mm. (b) Calculated reflection phase  $\Phi(x)$  for resonators having varying  $p$ , which comprise the meta-surface. (c) Calculated  $\Phi(x)$  for meta-surface at various incident sound frequencies. Sound pressure level (SPL) profile for (f) normally incident plane wave and (g) 15° obliquely incident plane wave at 1700 Hz resulting in focal points at approximately (0, 120) and approximately (-50, 87), respectively. (All positions are in millimetres.)

**Figure S6**

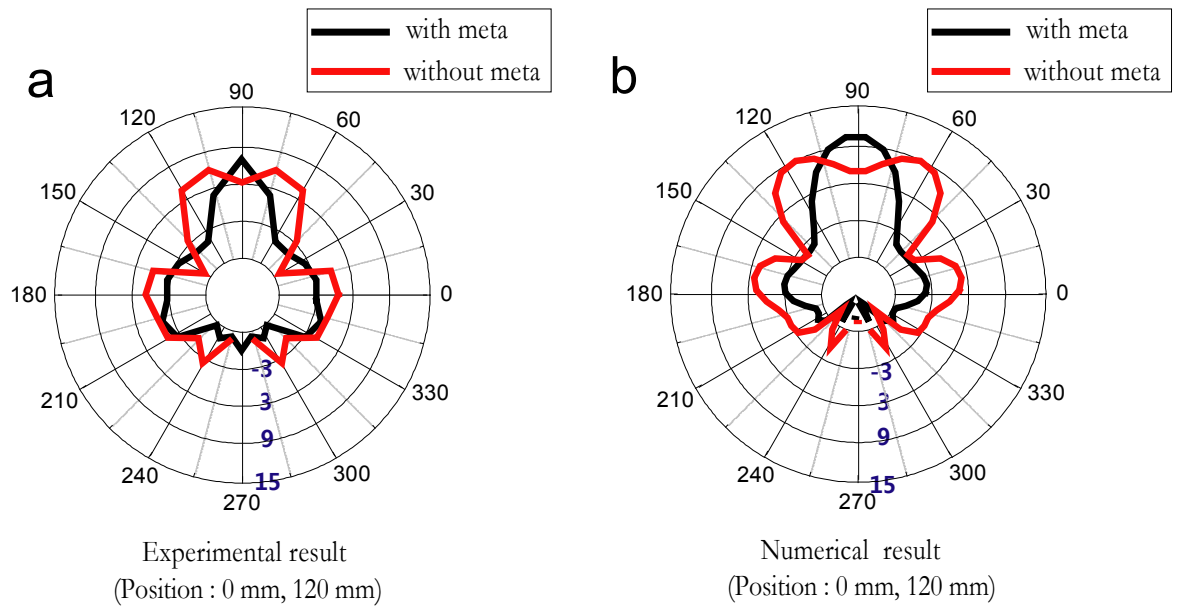

**Supplementary Fig. S6** | Sample 1 prototype with subwavelength separation  $d = 30$  mm. At 1700 Hz, experimental (a) and numerical result (b) for polar sound pressure level (SPL) gain for sound wave at (0, 120). (All positions are in millimetres.)

**Figure S7**

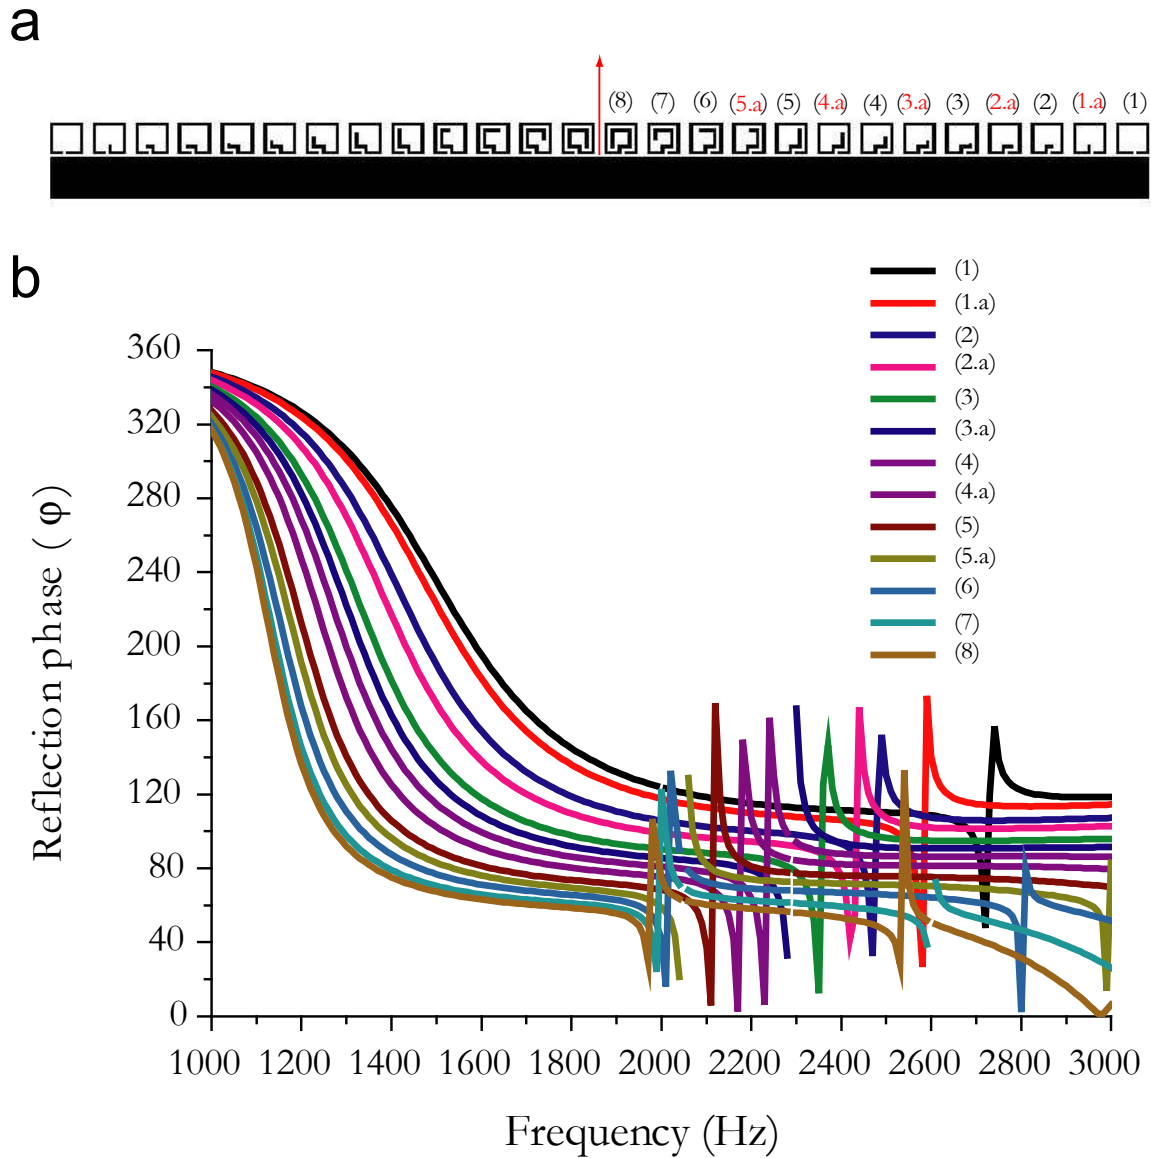

**Supplementary Fig. S7** | (a) Schematic of acoustic meta-surface consisting of array of Helmholtz resonators with varying coiled path lengths,  $p$  (Sample 4, number of resonators on each side,  $N=13$ ). The subwavelength width,  $s$ , subwavelength separation,  $d$ , gap,  $g$ , and total length,  $D$ , are fixed to 15, 20, 2, and 517.5 mm, respectively, while  $p$  is adjusted to 1, 3, 5.5, 9, 12.5, 14.5, 16.5, 20.5, 24, 27.5, 31, 33.5 and 36 mm. (b) Calculated reflection phase  $\Phi(x)$  for resonators having varying  $p$ , which comprise the meta-surface.

**Figure S8**

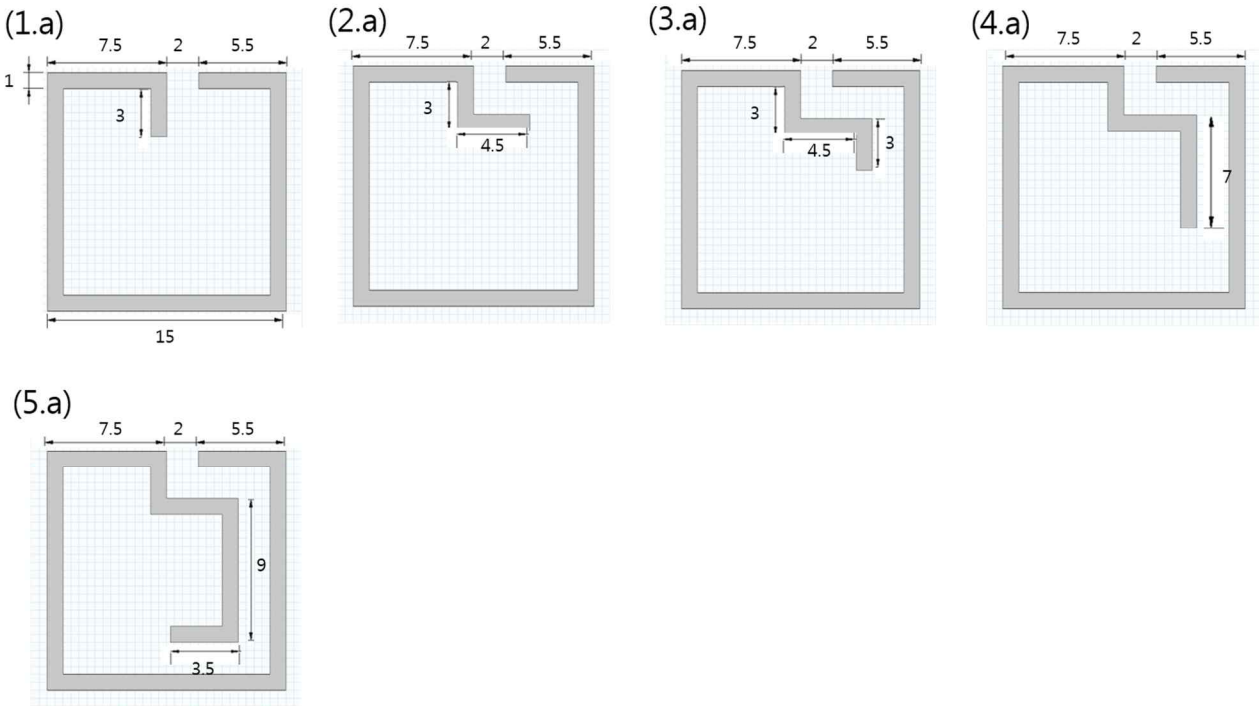

**Supplementary Fig. S8** | Basic geometries of 5 additional Helmholtz resonators

## Figure S9

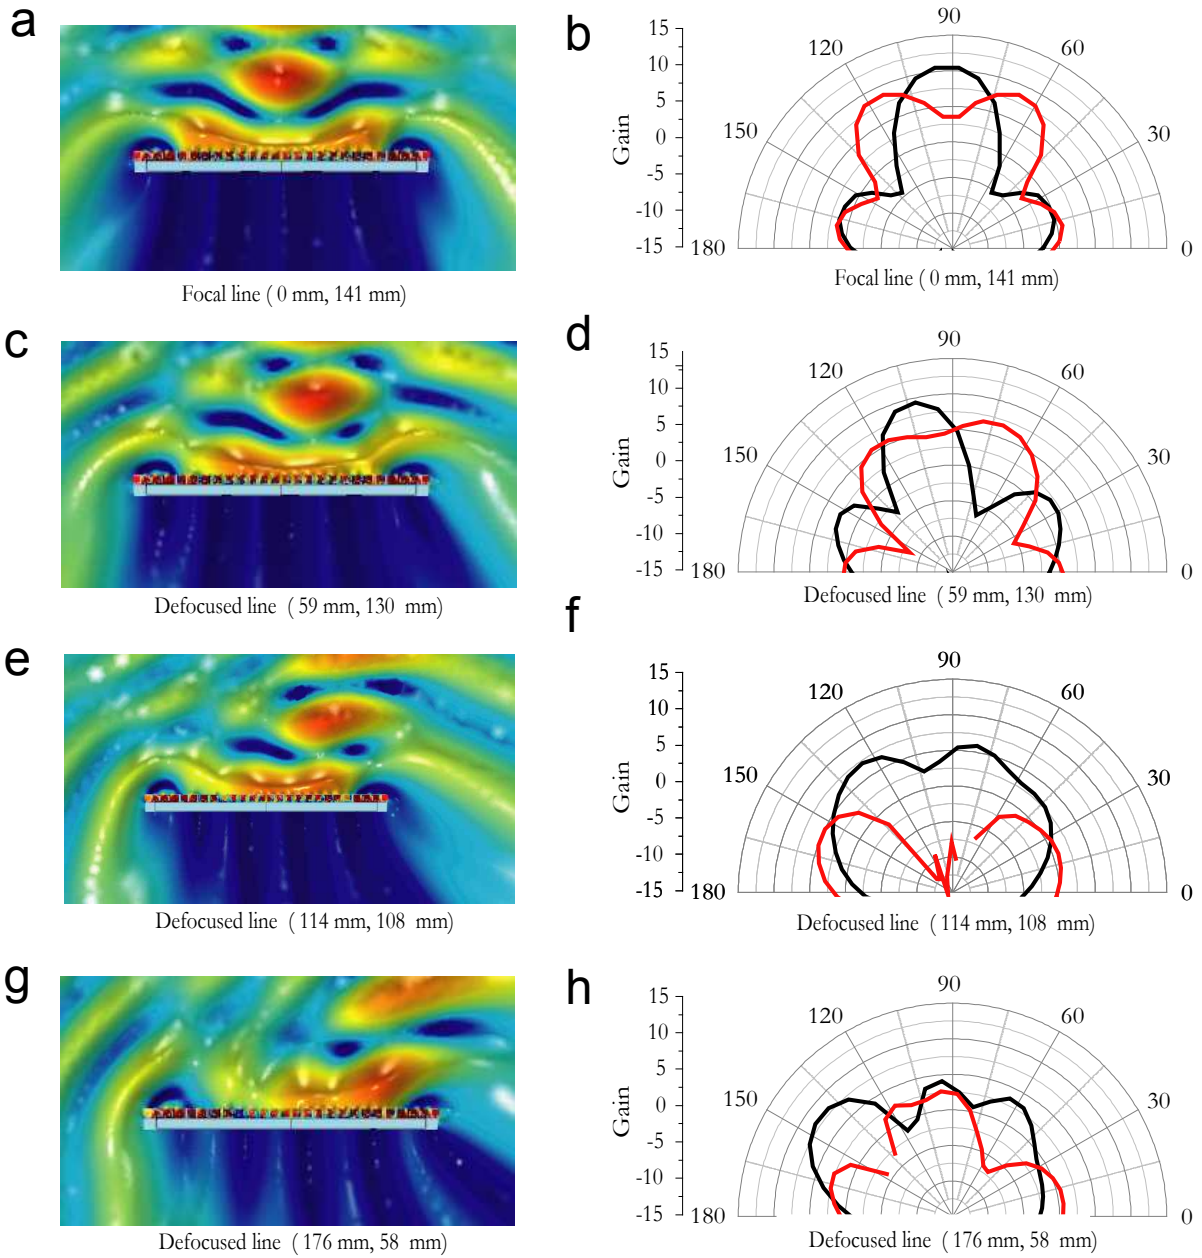

**Supplementary Fig. S9 | Numerical Simulations.** (a, c, e, g) At 1490 Hz, sound pressure level results for Sample 4 for normally, 15° obliquely, 30° obliquely, and 45° obliquely incident plane waves, respectively. (b, d, f, h) At 1490 Hz, calculated polar sound pressure level (SPL) gain for Sample 4 depending on detector positions: (0, 141), (59, 130), (114, 108), and (176, 58), respectively. (All positions are in millimetres.)

**Figure S10**

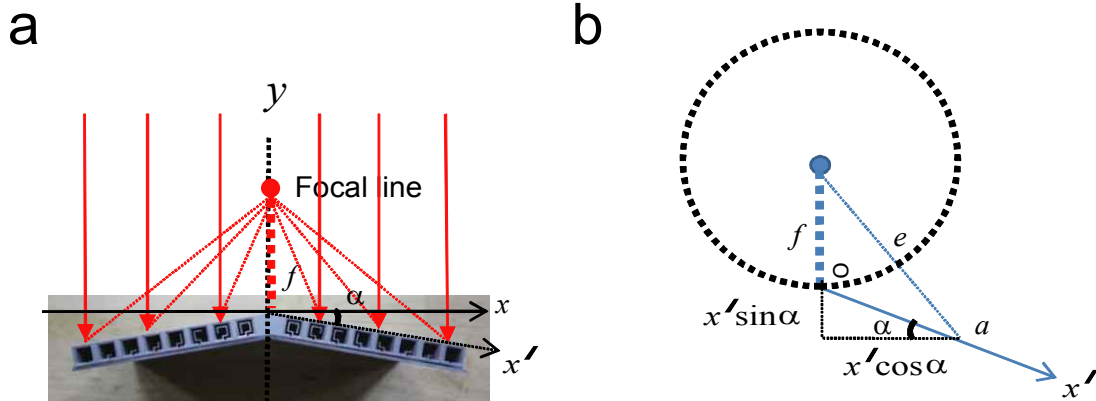

**Supplementary Fig. S10** | Convex acoustic metamaterial antenna design. (a) Conceptual figures of convex directional surface with symmetric phase gradient  $d\Phi(x')/dx'$  with respect to the origin. (b) The phase shift of the  $x'$  direction with tilt angle  $\alpha$  relative to the  $x$ -axis can be obtained by multiplying the distance  $\overline{ae}$  by  $2\pi/\lambda$ .

## Figure S11

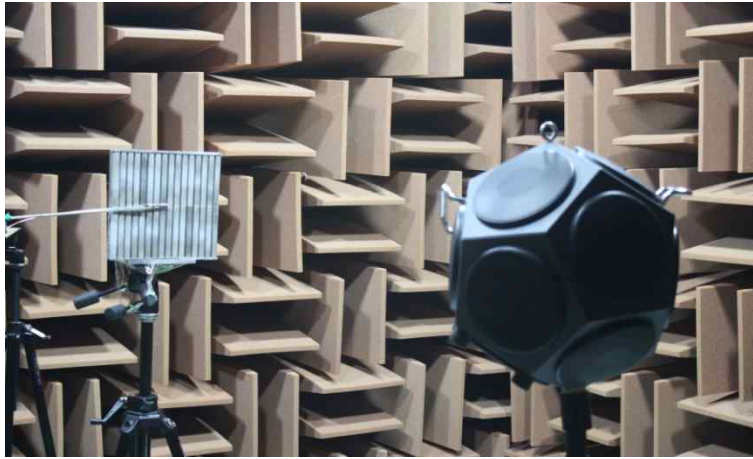

**Supplementary Fig. S11** | Photograph of experimental setup of sound antenna in a receiving mode for measuring microphone sound pressure level above the meta-surface 1.5 m away from sound speaker.

## Figure S12

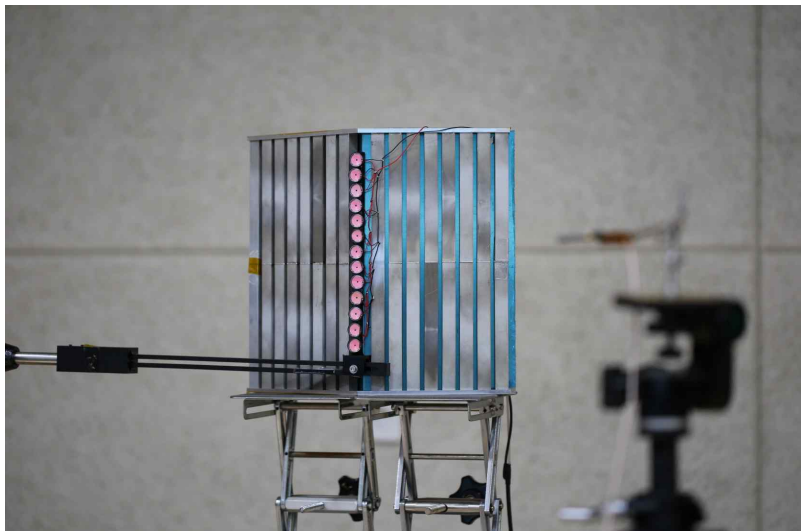

**Supplementary Fig. S12** | Photograph of experimental setup of sound antenna in a transmitting mode for measuring microphone sound pressure level above the meta-surface 1 m away from sound speaker.
